# Supplementary material for: An Outbred Calf Model for Determining Innate Immune Sensing and Evolutionary Trajectories of a Cell Culture-Adapted Bovine Foamy Virus Variant
Source: MDPI journal article supplement (doi:10.3390/v15081772), 2023-08-20
Supplement: s1 [file s1]

Figure S1. Alignment of 431 aa Gag protein sequences translated from sequences amplified from calves two weeks post inoculation with HT BFVbta Riems (calves 1 and 2) and wt BFVbta Riems (calves 3 and 4) variants and HT BFVbta Riems inoculum (HT inoculum) used for inoculation of calves 1 and 2. Red boxes indicate the sites where adaptive mutations in HT BFVbta infected calves were noted. Dark blue bars indicate insertions and gray bars deletions leading to frame-shift mutations. Reference sequences were as follows: pBFV-CMV-MDBK24\_HT [1] and GenBank derived: JX307862.1\_BFV Riems ; JX307861.1\_BFV100; NC001831.1\_BFV\_US ; AY134750.1 BFV\_3026\_CN.

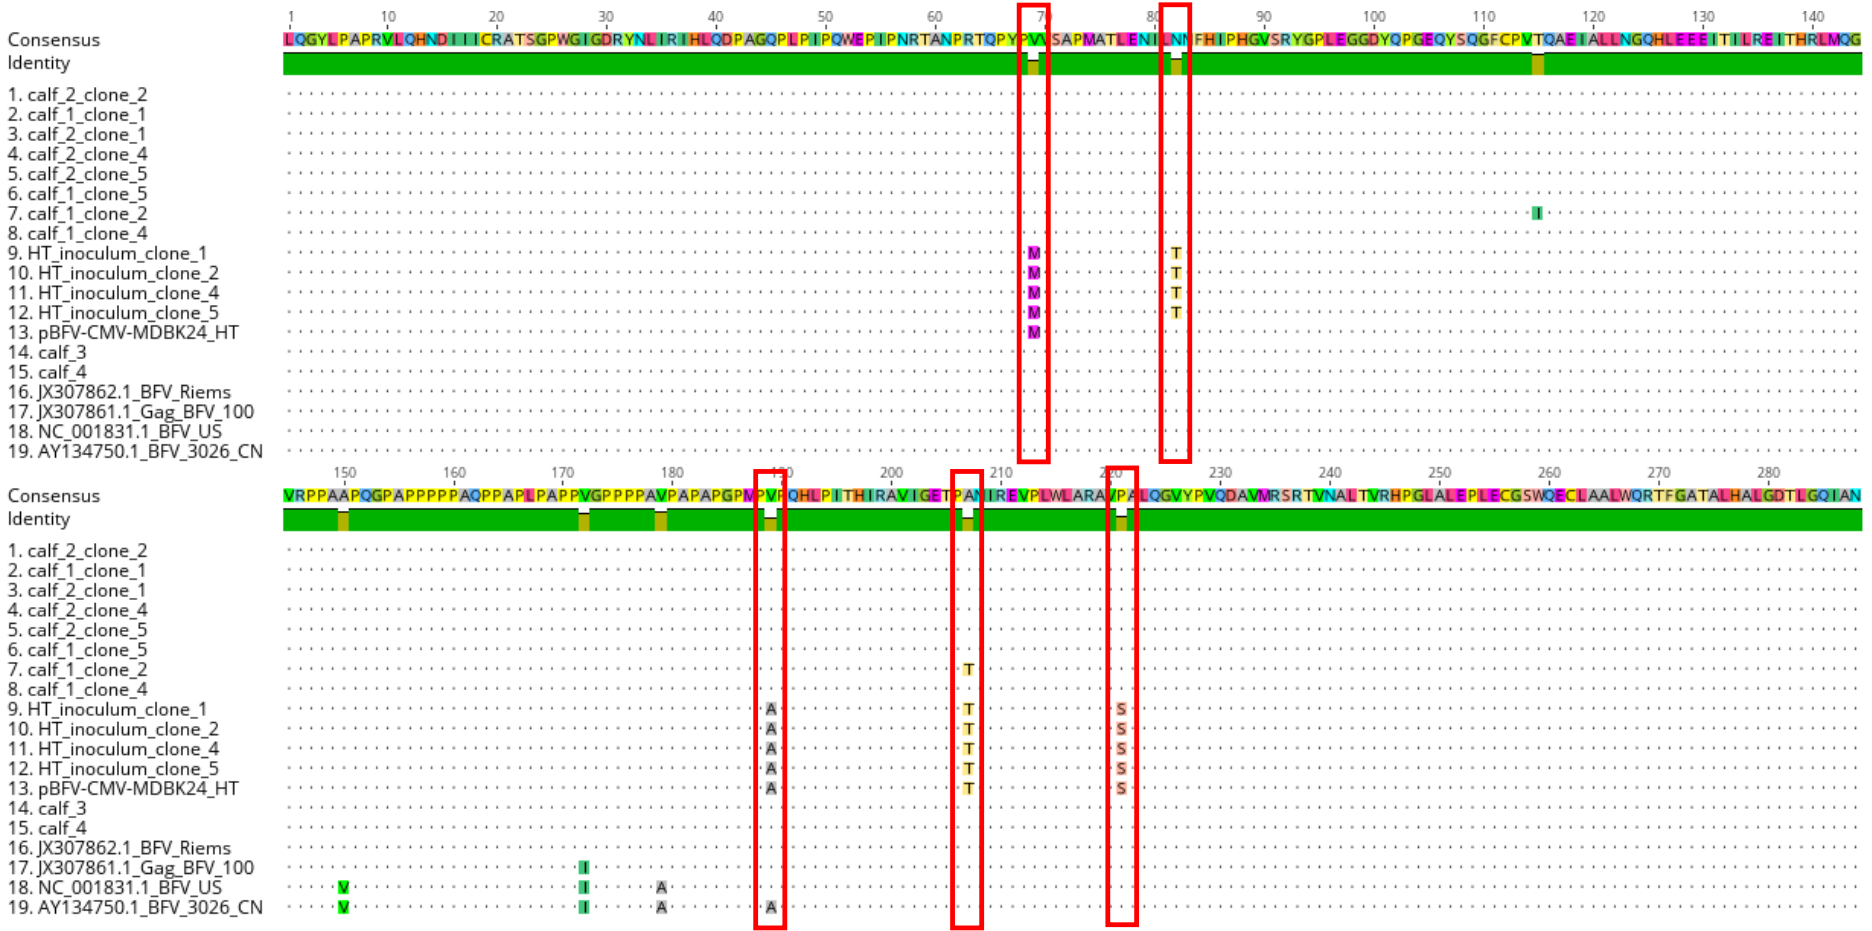

Consensus  
Identity

1. calf\_2\_clone\_2  
2. calf\_1\_clone\_1  
3. calf\_2\_clone\_1  
4. calf\_2\_clone\_4  
5. calf\_2\_clone\_5  
6. calf\_1\_clone\_5  
7. calf\_1\_clone\_2  
8. calf\_1\_clone\_4  
9. HT\_inoculum\_clone\_1  
10. HT\_inoculum\_clone\_2  
11. HT\_inoculum\_clone\_4  
12. HT\_inoculum\_clone\_5  
13. pBFV-CMV-MDBK24-HT  
14. calf\_3  
15. calf\_4  
16. JX307862.1\_BFV\_Riems  
17. JX307861.1\_Gag\_BFV\_100  
18. NC\_001831.1\_BFV\_U5  
19. AY134750.1\_BFV\_3026\_CN
